# Supplementary material for: Tailoring viscoelastic response of carbon nanotubes cellular structure using electric field
Source: Royal Society of Chemistry journal article supplement (doi:10.1039/c4nr04766d), 2014-01-01
Supplement: c4nr04766d1.pdf [file c4nr04766d1.pdf]

**Supplemental Material 1: Curve fitting exercise on data shown in Fig. 5b**

- The curve fitting exercise conducted using Equation (3):  $M1 = M_1$ ,  $M2 = \tau$  and  $M0 = t$

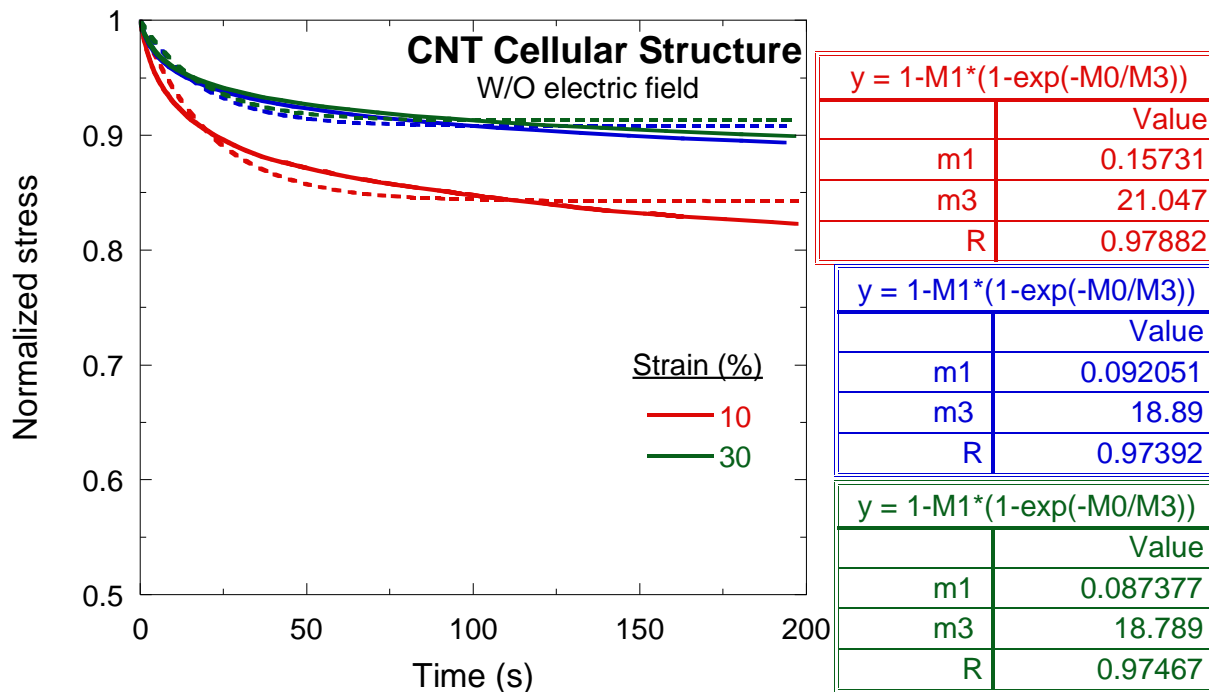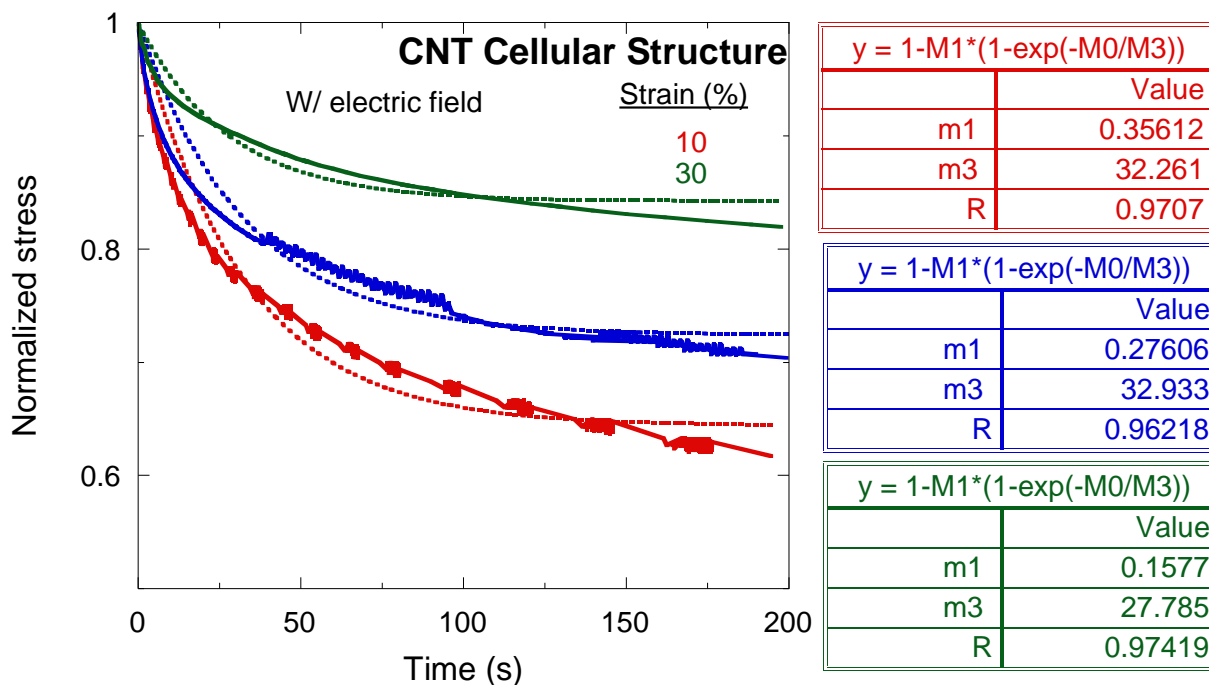

- The curve fitting exercise conducted using the KWW model:  $M1 = M_1$ ,  $M2 = \tau$ ,  $M3 = \beta$  and  $M0 = t$

$$\sigma_n(t) = 1 - M_1 \left( 1 - e^{-\left(\frac{t}{\tau}\right)^\beta} \right)$$

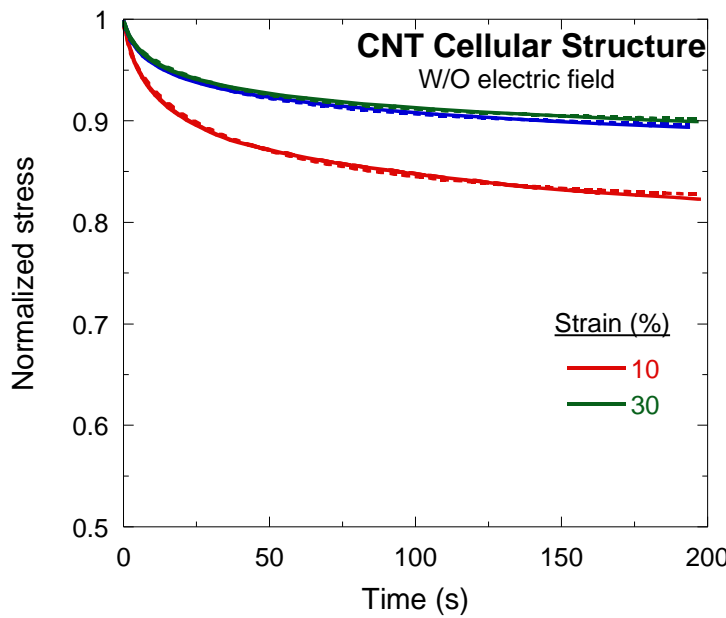

| y = 1-M1*(1-exp(-(M0/M2)^M3)... |         |
|---------------------------------|---------|
|                                 | Value   |
| m1                              | 0.18397 |
| m2                              | 35.972  |
| m3                              | 0.5979  |
| R                               | 0.99868 |

  

| y = 1-M1*(1-exp(-(M0/M2)^M3)... |         |
|---------------------------------|---------|
|                                 | Value   |
| m1                              | 0.11144 |
| m2                              | 36.679  |
| m3                              | 0.59171 |
| R                               | 0.99879 |

  

| y = 1-M1*(1-exp(-(M0/M2)^M3)... |         |
|---------------------------------|---------|
|                                 | Value   |
| m1                              | 0.10475 |
| m2                              | 35.416  |
| m3                              | 0.59556 |
| R                               | 0.99885 |

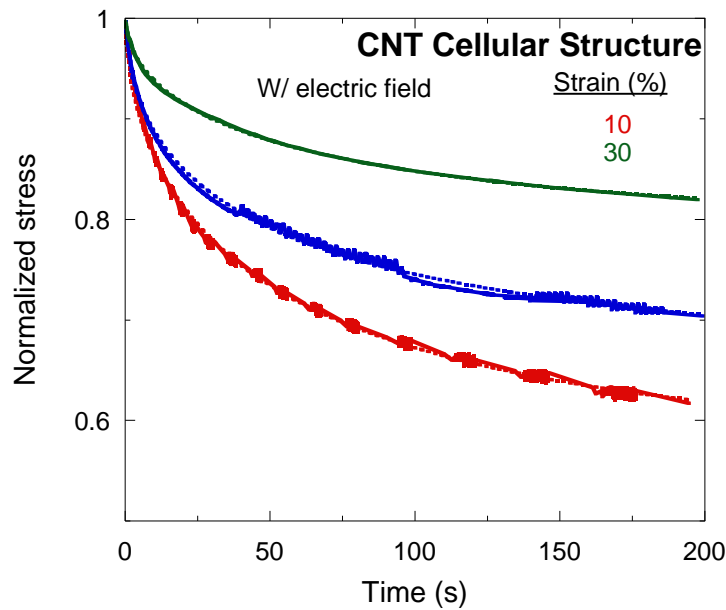

| y = 1-M1*(1-exp(-(M0/M2)^M3)... |         |
|---------------------------------|---------|
|                                 | Value   |
| m1                              | 0.43835 |
| m2                              | 56.8    |
| m3                              | 0.56511 |
| R                               | 0.9985  |

  

| y = 1-M1*(1-exp(-(M0/M2)^M3)... |         |
|---------------------------------|---------|
|                                 | Value   |
| m1                              | 0.34324 |
| m2                              | 56.87   |
| m3                              | 0.53429 |
| R                               | 0.99662 |

  

| y = 1-M1*(1-exp(-(M0/M2)^M3)... |         |
|---------------------------------|---------|
|                                 | Value   |
| m1                              | 0.21382 |
| m2                              | 68.301  |
| m3                              | 0.5633  |
| R                               | 0.99946 |
